# Supplementary material for: Specification of epibranchial placodes in zebrafish
Source: Oxford University Press journal article supplement (doi:10.1242/dev.02749), 2007-01-10
Supplement: dev02749tables1.pdf [file dev02749tables1.pdf]

**Table S1. Downregulated genes**

| Gene name            | Gene description                                                                    | Chr. location |        |        | Fold changes |
|----------------------|-------------------------------------------------------------------------------------|---------------|--------|--------|--------------|
| Tubule               | Whole testis                                                                        |               |        |        |              |
| <i>Ddx3y</i>         | DEAD (Asp-Glu-Ala-Asp) box polypeptide 3, Y-linked                                  | Y             | -157.6 | -724.1 |              |
| <i>Uty</i>           | ubiquitously transcribed tetratricopeptide repeat gene, Y chromosome                | Y             | -34.3  | -4.0   |              |
| <i>Eif2s3y</i>       | eukaryotic translation initiation factor 2, subunit 3, structural gene Y-linked     | Y             |        | -27.9  | -97.0        |
| <i>Jarid1d</i>       | jumonji, AT rich interactive domain 1D (Rbp2 like)                                  | Y             | -22.6  | -5.3   |              |
| <i>Nxf2</i>          | nuclear RNA export factor 2                                                         | X             | -16.0  | -12.1  |              |
| <i>Tuba3</i>         | tubulin, alpha 3                                                                    | 6             | -9.2   | -19.7  |              |
| <i>Dst</i>           | dystonin                                                                            | 1             | -9.2   | -4.3   |              |
| <i>Clca1</i>         | chloride channel calcium activated 1                                                | 3             | -7.5   | -4.6   |              |
| <i>Alcam</i>         | activated leukocyte cell adhesion molecule                                          | 16            | -5.7   | -2.1   |              |
| <i>Apod</i>          | apolipoprotein D                                                                    | 16            | -5.3   | -2.8   |              |
| <i>Kctd14</i>        | potassium channel tetramerisation domain containing 14                              | 7             | -5.3   | -2.3   |              |
| <i>Slc6a4</i>        | solute carrier family 6 (neurotransmitter transporter, serotonin), member 4         | 11            | -5.3   | -2.1   |              |
| <i>1190002H23Rik</i> | RIKEN cDNA 1190002H23 gene                                                          | 14            | -4.6   | -4.0   |              |
| <i>Jam2</i>          | junction adhesion molecule 2                                                        | 16            | -4.6   | -2.6   |              |
| <i>Scara5</i>        | scavenger receptor class A, member 5 (putative)                                     | 14            | -4.6   | -2.6   |              |
| <i>Ube1y1</i>        | ubiquitin-activating enzyme E1, Chr Y 1                                             | Y             | -3.7   | -7.0   |              |
| <i>9630031F12Rik</i> | RIKEN cDNA 9630031F12 gene                                                          | 5             | -3.5   | -3.0   |              |
| <i>Rab3b</i>         | RAB3B, member RAS oncogene family                                                   | 4             | -3.5   | -2.1   |              |
| <i>Nfkbiz</i>        | nuclear factor of kappa light polypeptide gene enhancer in B-cells inhibitor, zeta  | 16            | -3.2   |        | -2.5         |
| <i>Plod2</i>         | procollagen lysine, 2-oxoglutarate 5-dioxygenase 2                                  | 9             | -3.2   | -2.1   |              |
| <i>Morc1</i>         | microrchidia 1                                                                      | 16            | -3.0   | -7.0   |              |
| <i>BC022960</i>      | cDNA sequence BC022960                                                              | X             | -3.0   | -3.0   |              |
| <i>Trim7</i>         | tripartite motif protein 7                                                          | 11            | -3.0   | -2.1   |              |
| <i>Cxcr4</i>         | chemokine (C-X-C motif) receptor 4                                                  | 1             | -2.8   | -2.8   |              |
| <i>Dusp15</i>        | dual specificity phosphatase-like 15                                                | 2             | -2.8   | -2.0   |              |
| <i>Apoa2</i>         | apolipoprotein A-II                                                                 | 1             | -2.6   | -4.6   |              |
| <i>Id4</i>           | inhibitor of DNA binding 4                                                          | 13            | -2.6   | -3.2   |              |
| <i>Cd83</i>          | CD83 antigen                                                                        | 13            | -2.6   | -2.5   |              |
| <i>Ehd1</i>          | EH-domain containing 1                                                              | 19            | -2.6   | -2.3   |              |
| <i>3230401M21Rik</i> | RIKEN cDNA 3230401M21 gene                                                          | 18            | -2.5   | -2.3   |              |
| <i>MGI:1916782</i>   | homeobox only domain                                                                | 5             | -2.5   | -2.1   |              |
| <i>Bcl7c</i>         | B-cell CLL/lymphoma 7C                                                              | 7             | -2.5   | -2.0   |              |
| <i>Dtymk</i>         | deoxythymidylate kinase                                                             | 1             | -2.3   | -2.8   |              |
| <i>Cp</i>            | ceruloplasmin                                                                       | 3             | -2.3   | -2.5   |              |
| <i>Foxq1</i>         | forkhead box Q1                                                                     | 13            | -2.3   | -2.1   |              |
| <i>Tyro3</i>         | TYRO3 protein tyrosine kinase 3                                                     | 2             | -2.3   | -2.0   |              |
| <i>Hells</i>         | helicase, lymphoid specific                                                         | 19            | -2.1   | -7.0   |              |
| <i>Ris2</i>          | retroviral integration site 2                                                       | 8             | -2.1   | -2.6   |              |
| <i>Gadd45b</i>       | growth arrest and DNA-damage-inducible 45 beta                                      | 10            | -2.1   | -2.5   |              |
| <i>Edn1</i>          | endothelin 1                                                                        | 13            | -2.1   | -2.3   |              |
| <i>Stk4</i>          | serine/threonine kinase 4                                                           | 2             | -2.1   | -2.3   |              |
| <i>Galnt7</i>        | UDP-N-acetyl-alpha-D-galactosamine: polypeptide N-acetylgalactosaminyltransferase 7 |               |        | 8      | -2.1 -2.0    |
| <i>Rarres2</i>       | retinoic acid receptor responder (tazarotene induced) 2                             | 6             | -2.1   | -2.0   |              |
| <i>Zcchc3</i>        | zinc finger, CCHC domain containing 3                                               | 2             | -2.0   | -3.2   |              |
| <i>Ctnna1</i>        | catenin (cadherin associated protein), alpha-like 1                                 | 4             | -2.0   | -2.3   |              |
| <i>Plagl1</i>        | pleiomorphic adenoma gene-like 1                                                    | 10            | -2.0   | -2.3   |              |
| <i>1300007B12Rik</i> | RIKEN cDNA 1300007B12 gene                                                          | 1             | -2.0   | -2.1   |              |
| <i>4930588M11Rik</i> | RIKEN cDNA 4930588M11 gene                                                          | 3             | -2.0   | -2.1   |              |
