# Supplementary material for: Specification of epibranchial placodes in zebrafish
Source: Oxford University Press journal article supplement (doi:10.1242/dev.02749), 2007-01-10
Supplement: dev02749tables2.pdf [file dev02749tables2.pdf]

Table S2 Up-regulated genes

| Gene name                    | Gene description                                                     | Chr. location | Fold changes |              |
|------------------------------|----------------------------------------------------------------------|---------------|--------------|--------------|
|                              |                                                                      |               | Tubule       | Whole testis |
| <i>Xist</i>                  | inactive X specific transcripts                                      | X             | 48.5         | 27.9         |
| <i>Klk16</i>                 | kallikrein 16                                                        | 7             | 24.3         | 7.5          |
| <i>Asb12</i>                 | ankyrin repeat and SOCS box-containing protein 12                    | X             | 17.1         | 2.5          |
| <i>Sult1e1</i>               | sulfotransferase family 1E, member 1                                 | 5             | 14.9         | 7.0          |
| <i>Klk6</i>                  | kallikrein 6                                                         | 7             | 14.9         | 4.0          |
| <i>Col9a3</i>                | procollagen, type IX, alpha 3                                        | 2             | 13.0         | 4.6          |
| <i>Rhbg</i>                  | Rhesus blood group-associated B glycoprotein                         | 3             | 12.1         | 3.7          |
| <i>Klk27</i>                 | kallikrein 27                                                        | 7             | 9.8          | 4.9          |
| <i>Myh6</i>                  | myosin, heavy polypeptide 6, cardiac muscle, alpha                   | 14            | 9.8          | 3.0          |
| <i>D16Bwg1494e</i>           | DNA segment, Chr 16, Brigham & Women's Genetics 1494 expressed       | 16            | 9.2          | 4.0          |
| <i>FHOS2</i>                 | formin-family protein FHOS2                                          | 18            | 9.2          | 3.2          |
| <i>Snrpn</i>                 | small nuclear ribonucleoprotein N                                    | 7             | 9.2          | 2.8          |
| <i>Klk24</i>                 | kallikrein 24                                                        | 7             | 8.6          | 7.0          |
| <i>Cps1</i>                  | carbamoyl-phosphate synthetase 1                                     | 1             | 8.0          | 8.6          |
| <i>Stom</i>                  | stomatin                                                             | 2             | 8.0          | 2.3          |
| <i>Klk22 III Klk9</i>        | kallikrein 22 /// kallikrein 9                                       | 7             | 7.5          | 6.5          |
| <i>Svs5</i>                  | seminal vesicle secretion 5                                          | 2             | 7.5          | 3.2          |
| <i>Htatip2</i>               | HIV-1 tat interactive protein 2, homolog (human)                     | 7             | 7.5          | 2.3          |
| <i>Glb1</i>                  | galactosidase, beta 1                                                | 9             | 7.0          | 2.5          |
| <i>Klk21</i>                 | kallikrein 21                                                        | 7             | 6.5          | 6.5          |
| <i>Thrsp</i>                 | thyroid hormone responsive SPOT14 homolog (Rattus)                   | 7             | 6.5          | 4.9          |
| <i>Abcb1a</i>                | ATP-binding cassette, sub-family B (MDR/TAP), member 1A              | 5             | 6.5          | 2.8          |
| <i>RIKEN cDNA 1100001H23</i> | 1100001H23Rik                                                        | 6             | 6.5          | 6.5          |
| <i>Slc39a8</i>               | solute carrier family 39 (metal ion transporter), member 8           | 3             | 6.1          | 4.3          |
| <i>Akr1c12</i>               | aldo-keto reductase family 1, member C12                             | 13            | 6.1          | 2.0          |
| <i>Spp1</i>                  | secreted phosphoprotein 1                                            | 5             | 5.7          | 5.3          |
| <i>Gpx7</i>                  | glutathione peroxidase 7                                             | 4             | 5.7          | 2.3          |
| <i>Anxa3</i>                 | annexin A3                                                           | 5             | 5.7          | 2.0          |
| <i>Asb9</i>                  | ankyrin repeat and SOCS box-containing protein 9                     | --            | 5.3          | 2.5          |
| <i>Masp1</i>                 | mannan-binding lectin serine peptidase 1                             | 16            | 4.9          | 2.6          |
| <i>Klk1</i>                  | kallikrein 1                                                         | 7             | 4.6          | 5.7          |
| <i>A930025J12Rik</i>         | RIKEN cDNA A930025J12 gene                                           | 5             | 4.6          | 4.0          |
| <i>Hsd17b3</i>               | hydroxysteroid (17-beta) dehydrogenase 3                             | --            | 4.0          | 2.1          |
| <i>Ephx1</i>                 | epoxide hydrolase 1, microsomal                                      | 1             | 3.7          | 2.3          |
| <i>Rcn1</i>                  | reticulocalbin 1                                                     | 2             | 3.7          | 2.1          |
| <i>LOC544986</i>             | similar to hypothetical protein LOC67055                             | 14            | 3.5          | 3.2          |
| <i>Kit</i>                   | kit oncogene                                                         | 5             | 3.5          | 2.0          |
| <i>Vnn1</i>                  | vanin 1                                                              | 10            | 3.2          | 4.0          |
| <i>Mbp</i>                   | myelin basic protein                                                 | 18            | 3.2          | 2.8          |
| <i>Hsd3b1</i>                | hydroxysteroid dehydrogenase-1, delta<5>-3-beta                      | 3             | 3.2          | 2.5          |
| <i>Akr1c13</i>               | aldo-keto reductase family 1, member C13                             | 13            | 3.2          | 2.3          |
| <i>Itih2</i>                 | inter-alpha trypsin inhibitor, heavy chain 2                         | 2             | 3.2          | 2.3          |
| <i>Pcolce</i>                | procollagen C-endopeptidase enhancer protein                         | 5             | 3.2          | 2.0          |
| <i>Rdh11</i>                 | retinol dehydrogenase 11                                             | 12            | 3.0          | 3.7          |
| <i>Wnt5a</i>                 | wingless-related MMTV integration site 5A                            | 14            | 3.0          | 2.8          |
| <i>4933407N01Rik</i>         | RIKEN cDNA 4933407N01 gene                                           | 11            | 3.0          | 2.3          |
| <i>Plxnd1</i>                | Plexin D1 (Plxnd1), mRNA                                             | 6             | 3.0          | 2.3          |
| <i>Txk</i>                   | TXK tyrosine kinase                                                  | 5             | 3.0          | 2.3          |
| <i>Zfp185</i>                | zinc finger protein 185                                              | X             | 3.0          | 2.0          |
| <i>Tnfrsf12a</i>             | tumor necrosis factor receptor superfamily, member 12a               | 17            | 2.8          | 2.8          |
| <i>Tcn2</i>                  | transcobalamin 2                                                     | 11            | 2.8          | 2.6          |
| <i>Plp1</i>                  | proteolipid protein (myelin) 1                                       | X             | 2.8          | 2.5          |
| <i>MGI:1889205</i>           | plasma glutamate carboxypeptidase                                    | 15            | 2.8          | 2.1          |
| <i>Cd36</i>                  | CD36 antigen                                                         | 5             | 2.8          | 2.0          |
| <i>Slc39a8</i>               | solute carrier family 39 (metal ion transporter), member 8           | 3             | 2.6          | 5.7          |
| <i>Synpo</i>                 | synaptopodin                                                         | 18            | 2.6          | 3.5          |
| <i>Bscl2</i>                 | Bernardinelli-Seip congenital lipodystrophy 2 homolog (human)        | 19            | 2.6          | 3.0          |
| <i>Frzb</i>                  | frizzled-related protein                                             | 2             | 2.6          | 2.5          |
| <i>Car4</i>                  | carbonic anhydrase 4                                                 | 11            | 2.6          | 2.1          |
| <i>Cyp2d22</i>               | cytochrome P450, family 2, subfamily d, polypeptide 22               | --            | 2.6          | 2.1          |
| <i>Pcolce</i>                | procollagen C-endopeptidase enhancer protein                         | 5             | 2.6          | 2.1          |
| <i>Txndc5</i>                | thioredoxin domain containing 5                                      | 13            | 2.6          | 2.1          |
| <i>2310016C16Rik</i>         | RIKEN cDNA 2310016C16 gene                                           | 13            | 2.6          | 2.0          |
| <i>Myadm</i>                 | myeloid-associated differentiation marker                            | 7             | 2.6          | 2.0          |
| <i>Pld3</i>                  | phospholipase D family, member 3                                     | 7             | 2.6          | 2.0          |
| <i>Olig1</i>                 | oligodendrocyte transcription factor 1                               | 16            | 2.5          | 2.6          |
| <i>Hfe</i>                   | hemochromatosis                                                      | 13            | 2.5          | 2.5          |
| <i>Tceal3</i>                | transcription elongation factor A (SII)-like 3                       | X             | 2.5          | 2.5          |
| <i>4632428N05Rik</i>         | RIKEN cDNA 4632428N05 gene                                           | 10            | 2.5          | 2.3          |
| <i>Ctsp2</i>                 | cytidine 5'-triphosphate synthase 2                                  | X             | 2.5          | 2.3          |
| <i>Trp53inp1</i>             | transformation related protein 53 inducible nuclear protein 1        | 4             | 2.5          | 2.3          |
| <i>Sesn3</i>                 | sestrin 3                                                            | 9             | 2.5          | 2.1          |
| <i>Ndrq4</i>                 | N-myc downstream regulated gene 4                                    | 8             | 2.5          | 2.0          |
| <i>septin 6</i>              | 37504                                                                | X             | 2.5          | 2.5          |
| <i>Dnaja4</i>                | DnaJ (Hsp40) homolog, subfamily A, member 4                          | 9             | 2.3          | 4.0          |
| <i>Slc25a29</i>              | solute carrier family 25, member 29                                  | 12            | 2.3          | 2.8          |
| <i>Bbox1</i>                 | butyrobetaine (gamma), 2-oxoglutarate dioxygenase 1                  | 2             | 2.1          | 5.3          |
| <i>Atp6v0e2</i>              | ATPase, H+ transporting, lysosomal, V0 subunit E isoform 2           | 6             | 2.1          | 2.3          |
| <i>Dspg3</i>                 | dermatan sulphate proteoglycan 3                                     | 10            | 2.1          | 2.3          |
| <i>Mdfic</i>                 | MyoD family inhibitor domain containing                              | 6             | 2.1          | 2.0          |
| <i>9530028C05</i>            | hypothetical protein 9530028C05                                      | 6             | 2.0          | 5.3          |
| <i>A130022J15Rik</i>         | RIKEN cDNA A130022J15 gene                                           | 6             | 2.0          | 2.8          |
| <i>Acacb</i>                 | acetyl-Coenzyme A carboxylase beta                                   | 5             | 2.0          | 2.8          |
| <i>Dap</i>                   | death-associated protein                                             | 15            | 2.0          | 2.8          |
| <i>Utx</i>                   | ubiquitously transcribed tetratricopeptide repeat gene, X chromosome | X             | 2.0          | 2.8          |
| <i>Vcam1</i>                 | vascular cell adhesion molecule 1                                    | 3             | 2.0          | 2.8          |
| <i>Gpx3</i>                  | glutathione peroxidase 3                                             | 11            | 2.0          | 2.6          |
| <i>Sc5d</i>                  | sterol-C5-desaturase homolog                                         | 9             | 2.0          | 2.5          |
| <i>Tmem71</i>                | ransmembrane protein 71                                              | 15            | 2.0          | 2.5          |
| <i>Fkbp9</i>                 | FK506 binding protein 9                                              | 6             | 2.0          | 2.1          |
| <i>Acsl6</i>                 | acyl-CoA synthetase long-chain family member 6                       | 11            | 2.0          | 2.0          |
| <i>Actn3</i>                 | actinin alpha 3                                                      | 19            | 2.0          | 2.0          |
| <i>Lmo2</i>                  | LIM domain only 2                                                    | 2             | 2.0          | 2.0          |
